## Comparative molecular analyses of left-sided colon, right-sided colon, and rectal cancers

Mohamed E. Salem<sup>1,\*</sup>, Benjamin A. Weinberg<sup>1,\*</sup>, Joanne Xiu<sup>2</sup>, Wafik S. El-Deiry<sup>3</sup>, Jimmy J. Hwang<sup>4</sup>, Zoran Gatalica<sup>2</sup>, Philip A. Philip<sup>5</sup>, Anthony F. Shields<sup>5</sup>, Heinz-Josef Lenz<sup>6</sup> and John L. Marshall<sup>1</sup>

<sup>1</sup>Ruesch Center for The Cure of Gastrointestinal Cancers, Lombardi Comprehensive Cancer Center, Georgetown University Medical Center, Washington, DC, USA

<sup>2</sup>Caris Life Sciences, Phoenix, AZ, USA

<sup>3</sup>Fox Chase Cancer Center, Philadelphia, PA, USA

<sup>4</sup>Levine Cancer Institute, Carolinas HealthCare System, Charlotte, NC, USA

<sup>5</sup>Department of Oncology, Karmanos Cancer Institute, Wayne State University, Detroit, MI, USA

<sup>6</sup>Norris Comprehensive Cancer Center, University of Southern California, Los Angeles, CA, USA

\* Co-first authors

**Correspondence to:** Mohamed E. Salem, **email:** mohamed.e.salem@gunet.georgetown.edu

**Keywords:** colorectal neoplasms, colonic neoplasms, rectal neoplasms, DNA mutational analysis, immunohistochemistry

**Received:** June 01, 2017

**Accepted:** August 15, 2017

**Published:** September 21, 2017

**Copyright:** Salem et al. This is an open-access article distributed under the terms of the Creative Commons Attribution License 3.0 (CC BY 3.0), which permits unrestricted use, distribution, and reproduction in any medium, provided the original author and source are credited.

### ABSTRACT

**Tumor sidedness has emerged as an important prognostic and predictive factor in the treatment of colorectal cancer. Recent studies demonstrate that patients with advanced right-sided colon cancers have a worse prognosis than those with left-sided colon or rectal cancers, and these patient subgroups respond differently to biological therapies. Historically, management of patients with metastatic colon and rectal cancers has been similar, and colon and rectal cancer patients have been grouped together in large clinical trials. Clearly, the differences in molecular biology among right-sided colon, left-sided colon, and rectal cancers should be further studied in order to account for disparities in clinical outcomes. We profiled 10,570 colorectal tumors (of which 2,413 were identified as arising from the left colon, right colon, or rectum) using next-generation sequencing, immunohistochemistry, chromogenic in-situ hybridization, and fragment analysis (Caris Life Sciences, Phoenix, AZ). Right-sided colon cancers had higher rates of microsatellite instability, more frequent aberrant activation of the EGFR pathway including higher *BRAF* and *PIK3CA* mutation rates, and increased mutational burden compared to left-sided colon and rectal cancers. Rectal cancers had higher rates of *TOPO1* expression and *Her2/neu* amplification compared to both left- and right-sided colon cancers. Molecular variations among right-sided colon, left-sided colon, and rectal tumors may contribute to differences in clinical behavior. The site of tumor origin (left colon, right colon, or rectum) should certainly be considered when selecting treatment regimens and stratifying patients for future clinical trials.**

## INTRODUCTION

The impact of tumor location on patient survival and response to therapies has been shown in large clinical trials; however, the underlying tumor biology explaining these differences has not been systematically explored. In fact, cancers arising from the colon and rectum are often grouped together and generally categorized as colorectal cancer (CRC) despite their distinctly different clinical behaviors and management needs. The right colon has a different embryological origin and blood supply from the left colon and rectum. The superior mesenteric artery supplies midgut structures from the mid-duodenum to the mid-transverse colon, whereas the inferior mesenteric artery supplies hindgut structures from the mid-transverse colon to the rectum [1]. CRC has recently been divided into four consensus molecular subtypes (CMS): microsatellite instability immune (CMS1), canonical (CMS2), metabolic (CMS3), and mesenchymal (CMS4) [2]. The differential distribution of the four classes in various anatomic regions suggests biological differences in right-sided colon, left-sided colon, and rectal tumors. We investigated the proteomic and genetic aberrations of a large cohort of clinical CRC samples to further delineate these molecular differences.

A potentially practice-changing retrospective analysis of the pivotal CALGB/SWOG 80405 study presented at the 2016 ASCO Annual Meeting demonstrated that patients with *KRAS* wild-type metastatic colon cancer from a right-sided primary colon tumor had shorter median overall survival (mOS, 19.4 months) than patients with metastatic left-sided primary colon cancers (33.3 months, hazard ratio [HR] = 1.55, 95% confidence interval [CI] = 1.32-1.82,  $P < .0001$ ) [3]. Among patients who received cetuximab, mOS was 36 months for patients with left-sided tumors but only 16.7 months for patients with right-sided tumors (HR = 1.87, 95% CI = 1.48-2.32,  $P < .0001$ ). Following bevacizumab treatment, mOS was 31.4 months for patients with left-sided tumors and 24.2 months for those with right-sided tumors (HR = 1.32, 95% CI = 1.05-1.65,  $P = 0.01$ ). Moreover, bevacizumab led to better outcomes than cetuximab among patients with right-sided tumors regardless of *KRAS* mutational status, whereas cetuximab performed better than bevacizumab in patients with *KRAS* wild-type left-sided tumors. Similarly, the Canadian NCIC CO.17 trial of 399 patients showed that the OS benefit of cetuximab was more pronounced in patients with left-sided tumors, regardless of *KRAS* mutational status [4]. Coincidentally, the recent retrospective analysis of the FIRE-3 and CRYSTAL trials inarguably showed that patients with left-sided tumors had a markedly better prognosis than those with right-sided tumors and that first-line FOLFIRI plus cetuximab clearly benefited patients with left-sided tumors whereas patients with right-sided tumors derived limited benefit from any standard treatment [5].

An analysis of the SEER database showed that patients with right-sided stage III or IV colon cancers had inferior mOS when compared to left-sided colon and rectal cancers [6]. Another study profiled 198 *KRAS* wild-type metastatic CRCs (mCRC) and found that right-sided tumors were associated with having a high CpG island methylator phenotype (CIMP, odds ratio [OR] = 2.35, 95% CI 1.22-4.54) and being *BRAF* mutation-positive (OR = 5.45, 95% CI 2.47-12.03), conferring worse survival outcomes and a poorer response to anti-epidermal growth factor receptor (EGFR) therapies [7]. Thus, it appears that metastatic tumors arising in the left versus right side of the colon are biologically different and respond differently to therapy.

We examined 2,413 biospecimens to determine whether primary colon and rectal cancers are molecularly different. If there are biological differences, these should be defined due to their potential to affect tumor response to chemotherapy, targeted biological therapy, or immunotherapy. Furthermore, it is quite possible that future CRC clinical trials should incorporate stratification of patients according to their primary site of disease.

## RESULTS

### Tumor characteristics

Profiling of 10,570 colorectal tumors took place, but only 2,529 of these had clearly annotated tumor origins. Transverse colon tumors (116) were excluded, and our analysis included 304 right colon tumors, 664 left colon tumors, and 1,445 rectal tumors (Figure 1). A total of 1,730 samples were from primary tumors, 457 were from metastases, and 226 tumors could not be identified as primary or metastatic. The lower than expected number of colon cancers was due to the exclusion of many cases that did not specify the location within the colon. Biomarker comparisons were performed on the 1,730 primary tumors, including 1,424 tested with immunohistochemistry (IHC), 753 with next-generation sequencing (NGS) on the MiSeq platform, and 70 with NGS on the NextSeq platform.

### Patient characteristics

Patients with right-sided colon tumors were significantly older than patients with left-sided colon tumors (64 vs. 59 years,  $P < 0.001$ ) as well as those with rectal tumors (64 vs. 59 years,  $P < 0.001$ ). The age of patients with left-sided colon tumors was similar to that of patients with rectal tumors ( $P = 0.79$ ). Sixty-two percent of rectal tumors were from male patients, and this was significantly higher than the male percentage of left- (54%,  $P = 0.001$ ) and right-sided (44%,  $P < 0.0001$ ) colon tumors (Table 1).

**Table 1: Patient characteristics of age and gender by tumor location (right colon, left colon, or rectal)**

|                                            | Right colon                                                                           | Left colon | Rectum     |
|--------------------------------------------|---------------------------------------------------------------------------------------|------------|------------|
| Age (median, interquartile range in years) | 64 (54-74)                                                                            | 59 (50-68) | 59 (51-67) |
|                                            | Right vs. Left: P = 6.2E-08, Left vs. Rectum: P = 0.79, Right vs. Rectum: P = 1.0E-08 |            |            |
| Gender (% male)                            | 44%                                                                                   | 54%        | 62%        |
|                                            | Right vs. Left: P = 0.0046, Left vs. Rectum: P = 0.001, Right vs. Rectum: P < 0.0001  |            |            |

**Comparison of molecular alterations of 1,730 primary tumors based on their site of origin**

**Common CRC mutations**

Rates of pathogenic and presumed pathogenic mutations were compared among right-sided colon, left-sided colon, and rectal tumors (Figure 2A). *BRAF* mutations were seen in 25% of right-sided colon, 7% of left-sided colon, and 3.2% of rectal tumors. The majority of *BRAF* mutations seen in right and left colon tumors were V600E mutations (42 out of 45 [93%], right; 17 out of 22 [77%], left), which was not the case for the rectum, where only half (5 out of 10 or 50%) were *BRAF* V600E mutations. On further comparison of right and left colon and rectal cancers, *TP53* and *APC* were significantly more frequently mutated in rectal than right colon tumors, whereas the converse was true for *PIK3CA*, *CTNNB1*, *ATM*, *PTEN*, and *BRCA1*. Notably, *BRAF*, *PIK3CA*, *CTNNB1*, *ATM*, and *PTEN* showed decreasing mutational frequencies from the right side to the left side of the colon

to the rectum, while increasing mutation frequencies of *TP53* and *APC* were seen.

**MMRd (mismatch repair deficient) tumors**

In the portion of cases that underwent microsatellite instability fragment analysis (MIA), MMRd was seen in 22.3% (25/112) of right-sided colon tumors, 7.1% (3/42) of left-sided colon tumors, and only 0.7% (1/133) of rectal tumors—all were statistically significantly different from each other (Figure 3). Multivariate analysis by logistic regression confirmed that, after correction for gender, age, and tumor classification (primary vs. metastatic), all differences remained statistically significant (left vs. rectum odds ratio [OR] = 8.84, P = 0.039; right vs. left OR = 5.89, P = 0.0000037; right vs. rectum OR = 52.04, P = 0.00015).

**MMRp (mismatch repair proficient) tumors**

We also looked at the mutational landscape in the subgroup of MMRp tumors (Figure 2B), which incorporated 78% (87/112) of right-sided colon tumors, 95% (207/217) of left-sided colon tumors, and 99%

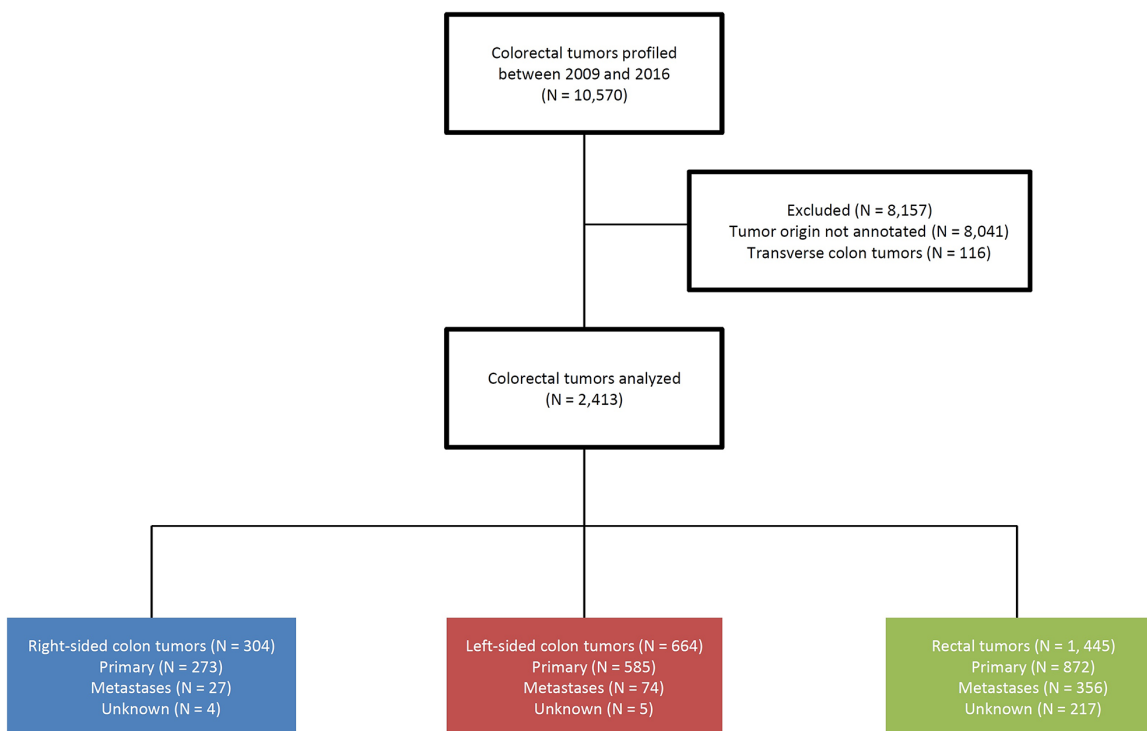

**Figure 1: Diagram of colorectal tumors included in this study.**

(132/133) of rectal tumors. In concordance with *BRAF* mutation patterns seen in all primary MMRp tumors just described, the highest *BRAF* mutation rate was seen in the right colon (13%), whereas the lowest rate was in

the rectum (2%,  $P = 0.003$ ). In left-sided colon tumors, the *BRAF* mutation rate was 4%, which was significantly lower than right-sided colon tumors ( $P = 0.004$ ). The *PIK3CA* and *PTEN* mutation rates in MMRp tumors

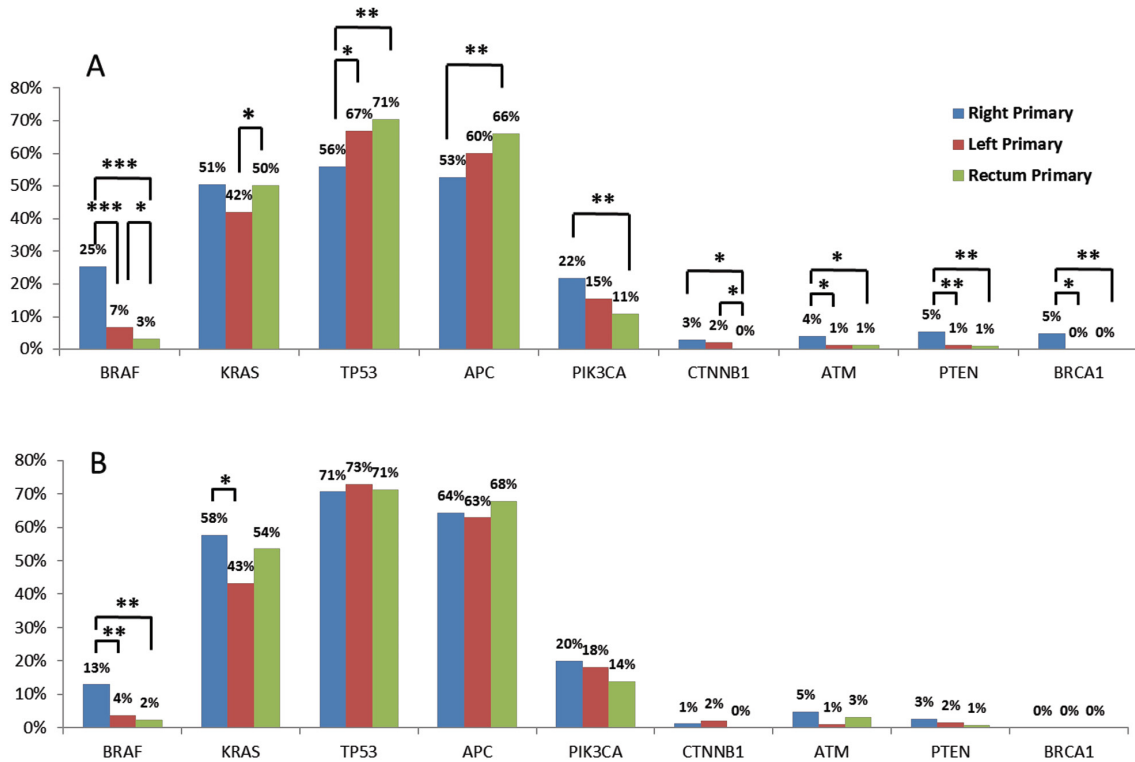

**Figure 2: Gene mutation rates in primary tumors of right-sided colon tumors, left-sided colon tumors, and rectal tumors.** \* =  $p < 0.05$ , \*\* =  $p < 0.01$ , \*\*\* =  $p < 0.001$  by Chi-squared tests. (A) Comparison in all primary tumors; (B) comparison in MMRp tumors.

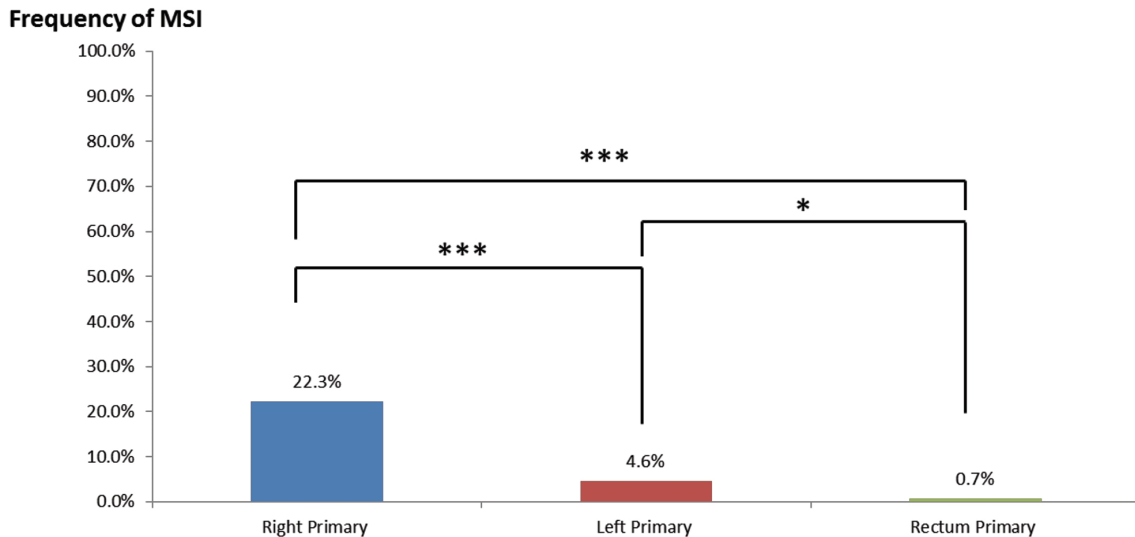

**Figure 3: MMRd frequency in right-sided colon cancers, left-sided colon cancers, and rectal cancers.** \* =  $p < 0.05$ , \*\*\* =  $p < 0.001$  by Chi-squared tests.

decreased from right-sided to left-sided colon to rectum; however, the differences were not statistically significant.

### Tumor mutational load (TML)

Mutational load was calculated for 70 primary colorectal tumors sequenced for 592 genes by NGS (Figure 4). Sixty-four tumors showed less than 17 mutations/megabase (MB), 57 of which had microsatellite instability (MSI), shown by fragment analysis, and all were MMRp. Six tumors had greater than 17 mutations/MB (range, 21 - 176 mutations/MB), and 83% of these tumors (5/6) were MMRd ( $P = 0.0183$ ), while one was MMRp with a double *POLE* mutation (V411L and P697S, 246 total mutations).

Right-sided colon tumors had an average of 24.5 mutations/MB (standard error [SE] = 9.46), which was higher than that seen in left-sided colon tumors (5.5 mutations/MB, SE = 0.52,  $P = 0.0598$ ) and rectal tumors (5.9 mutations/MB, SE = 0.457,  $P = 0.0647$ ).

It is worth noting that out of the 70 tumors assessed for mutational load, 5 of 19 (26%) right-sided colon tumors, 0 of 29 (0%) left-sided colon tumors, and 0 of 15 (0%) rectal tumors were MMRd.

When mutational load was calculated for MMRp tumors only ( $n = 58$ ), the average TML in right-sided colon was 18.3 mutations/MB and was 5.7 mutations/MB in both left-sided colon and rectal tumors. The differences were not significant and the numerical difference was caused by the one right-sided colon tumor with a *POLE* mutation.

### Protein expression

As shown in Figure 5, IHC revealed statistically significant differences in protein expression of markers

in right-sided, left-sided colon, and rectal tumors, either when all primary tumors (Figure 5A) or when only MMRp tumors were compared (Figure 5B). Protein expression of 12 markers (MGMT, TOPO1, TOP2A, ERCC1, TUBB3, EGFR, TS, PGP, PTEN, RRM1, TLE3 and PD-1) was significantly different in rectal tumors when compared to left- or right-sided colon tumors, or both. In particular, EGFR expression was significantly higher in the right-sided tumors than the left-sided and rectal tumors, independent of MMR status; in contrast, TOPO1 expression was higher in rectal tumors compared to the right-sided and left-sided colon, again independent of MMR status. In addition, PD-1 expression on tumor infiltrating lymphocytes was more often seen in right-sided tumors, but not when only MMRp tumors were evaluated, indicating that the difference was likely associated with MMR status.

Her2/neu gene amplification and protein expression were evaluated by chromogenic *in situ* hybridization (CISH) and IHC, respectively (Figure 6). Even though Her2/neu frequency was low overall, rectal tumors carried the highest rate of gene amplification and overexpression (5.4% and 2.7%, respectively) when compared to left-sided (2.8% and 1.7%) and right-sided (1.3% and 1.4%) colon tumors. Her2/neu gene amplification was significantly higher in rectal tumors compared to right-sided colon tumors ( $P = 0.03$ ).

## DISCUSSION

These findings raise important questions: are right- and left-sided colon cancers biologically distinct from rectal cancers, and could this impact the choice of therapy

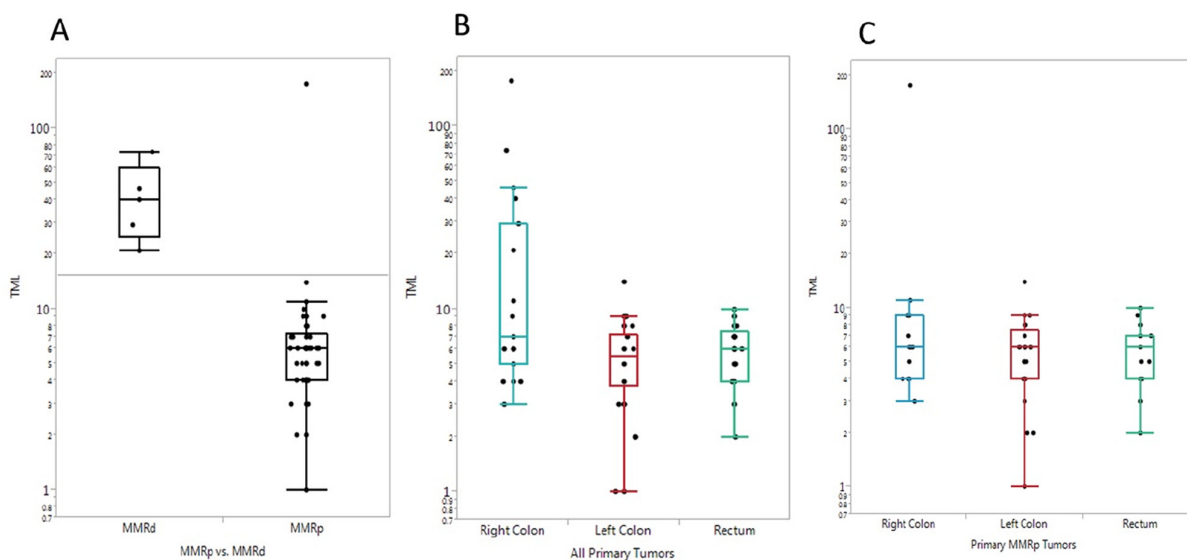

**Figure 4: Box plots of mutational load seen in each tumor and correlation with MMR status and tumor location. (A)** Mutational load per tumor (number of mutations per megabase) in MMRp and MMRd tumors. **(B)** Mutational load comparison in primary tumors of the right colon, left colon, and rectum. **(C)** Mutational load comparison in MMRp primary tumors of the right colon, left colon, and rectum.

for these distinct cancer groups [8]? Mutational analyses of primary tumors have suggested important differences in oncogenic driver mutations between colon and rectal cancers. In one study of 158 patients with metastatic colon cancers and 64 patients with metastatic rectal cancers, colon cancers had a higher *BRAF* mutation rate compared to rectal cancers (13.3% vs. 3.1%,  $P < 0.05$ ), but lower rates of *NRAS* (0.6% vs. 12.5%,  $P < 0.05$ ) and *TP53* mutations (17.7% vs. 29.7%,  $P < 0.05$ ). *KRAS* mutation rates were similar (37.3% vs. 34.4%;  $P > 0.05$ ) [9]. These differences offer insight into the potential use of EGFR inhibitors due to the fact that only patients with *RAS* and *BRAF* wild-type tumors derive benefit [10, 11] (although results from the study by Venook and colleagues suggested that cetuximab might actually be detrimental to patients with right-sided tumors, regardless of *RAS* status [3], meaning that other factors are coming into play).

Another study of 1,443 colon and rectal cancers demonstrated that a greater percentage (19-37%) of proximal colon cancers are MMRd compared to only 1.6% of rectal cancers, suggesting that rectal cancers may be less responsive to novel immunotherapies such as anti-PD-1 or anti-PD-L1 (checkpoint) inhibitors [12, 13].

Using a large cohort of colorectal tumors submitted for profiling, we performed a systematic comparison of molecular alterations between tumors collected from different

locations, including a large cohort of 1,445 rectal tumors. This sample size is in sharp contrast to the previous work done by The Cancer Genome Atlas (TCGA) which compared only 132 colon and 62 rectal tumors, although the TCGA data was obtained prospectively [14]. Despite the exclusion of a large number of colon tumors from profiling analyses, specifically those without clear annotation of tumor location ( $N = 8,041$ ) and those taken from the transverse colon ( $N = 116$ ), ours is still one of the largest cohorts analyzed and reported to date. All tumors were microdissected and only tumor tissue was sampled for NGS, eliminating potential confounding mutations from non-malignant stromal regions that could influence genetic profiles by inappropriately suggesting epithelial-mesenchymal transition [15]. Our biomarker analysis included only primary tumors due to the significantly different molecular profiles of primary and metastatic CRC [16].

In our analysis, rectal tumors were more common in men whereas right-sided tumors were more common in women. This finding agrees with those from previous studies demonstrating that women are more likely to have right-sided tumors [17, 18]. The tendency of women to develop right-sided tumors likely reflects the protective role of estrogen in the development of CRC due to its anti-inflammatory effect on the tumor microenvironment [19]. In fact, estrogen receptor expression is higher in right-

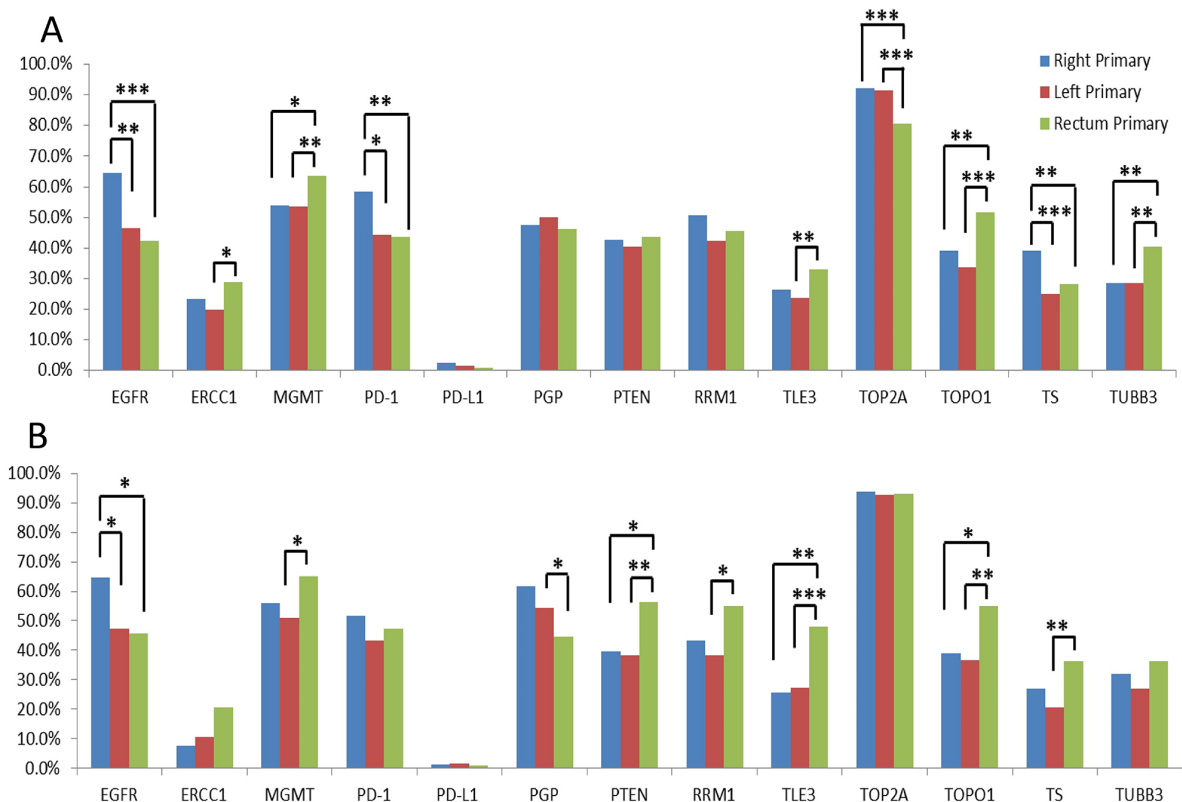

**Figure 5: Protein expression rates in primary tumors of the right colon, left colon, and rectum.** \* =  $p < 0.05$ , \*\* =  $p < 0.01$ , \*\*\* =  $p < 0.001$  by Chi-squared tests. (A) Comparison in all primary tumors; (B) comparison in MMRp tumors.

sided than left-sided colon tumors [20]. The rightward shift toward more proximal colon MMRd tumors in older female patients may be explained by the inevitable reduction in estrogen levels with age [17, 21].

We show a dramatic decrease in MMRd tumors when moving from right to left colon to rectum. MSI is caused by loss of MMR function and is generally found in about 15% of all CRCs, including around 3% of CRCs associated with hereditary non-polyposis CRC (HNPCC), also known as Lynch Syndrome [22]. Regardless of origin, patients with MMRd tumors are resistant to conventional chemotherapies, including 5-FU [23-25]. However, these tumors carry a hypermutated phenotype associated with the generation of neoantigens, making them promising candidates for immune checkpoint inhibition [13, 24]. Our results show that approximately one quarter of right-sided colon tumors are MMRd and may benefit from treatment with checkpoint inhibitors, providing a very promising therapeutic opportunity for this subgroup of colon tumors with poor prognosis and limited treatment options [3, 6, 26]. Others have observed that even in MMRp tumors, higher mutational load positively correlates with lymphocyte infiltration and improved CRC-specific survival [27].

We show a significant decrease in the *BRAF* mutation rate from right colon (25%) to left colon (15%) to rectum (3%). These values contrast significantly with the previously reported 5-10% *BRAF* mutation rate [28, 29], probably due to the fact that colon (both sides) and rectal tumors were grouped together in previous studies. Our findings confirm the results of previous studies

demonstrating the right-sided predominance of *BRAF*-mutated CRC (comprising 22% of right-sided, 4% of left-sided, and 2% of rectal CRCs) [28]. Mutated *BRAF* has been associated with MSI and CIMP [30]. Patients with *BRAF*-mutated CRCs carry the worst overall prognosis among CRC patients and are notoriously refractory to therapy, despite best efforts with currently available *BRAF*-targeted agents and various combination therapies [31]. One analysis of three independent cohorts that grouped rectal tumors with left-sided colon tumors showed that, although *BRAF* mutations were more prevalent in right-sided tumors, right-sided location was a negative prognostic variable independent of *BRAF* mutational status [32]. Patients with *RAS* and *BRAF* wild-type right-sided tumors from the PRIME, PEAK, and 181 studies had inferior OS, progression-free survival (PFS), and objective response rate (ORR), and similar survival outcomes were observed in subgroup analyses of *RAS* wild-type tumors from the FIRE-3, CRYSTAL, and CALBG/SWOG 80405 studies [3, 5, 33]. Our observations suggests that within the left-sided group, there is a decrease of *BRAF* mutation rate from left colon to rectum and that the different *BRAF* mutation rates might contribute to the different behavior of left- and right-sided colon cancers and rectal cancers.

Additional important findings from our study include the significantly lower activation of the PI3K/AKT/mTOR pathway in rectal tumors compared to left- and right-sided colon tumors, with lower mutation rates of *PIK3CA* and *PTEN* in rectal tumors. Although agents that directly target the PI3K/AKT/mTOR pathway have been

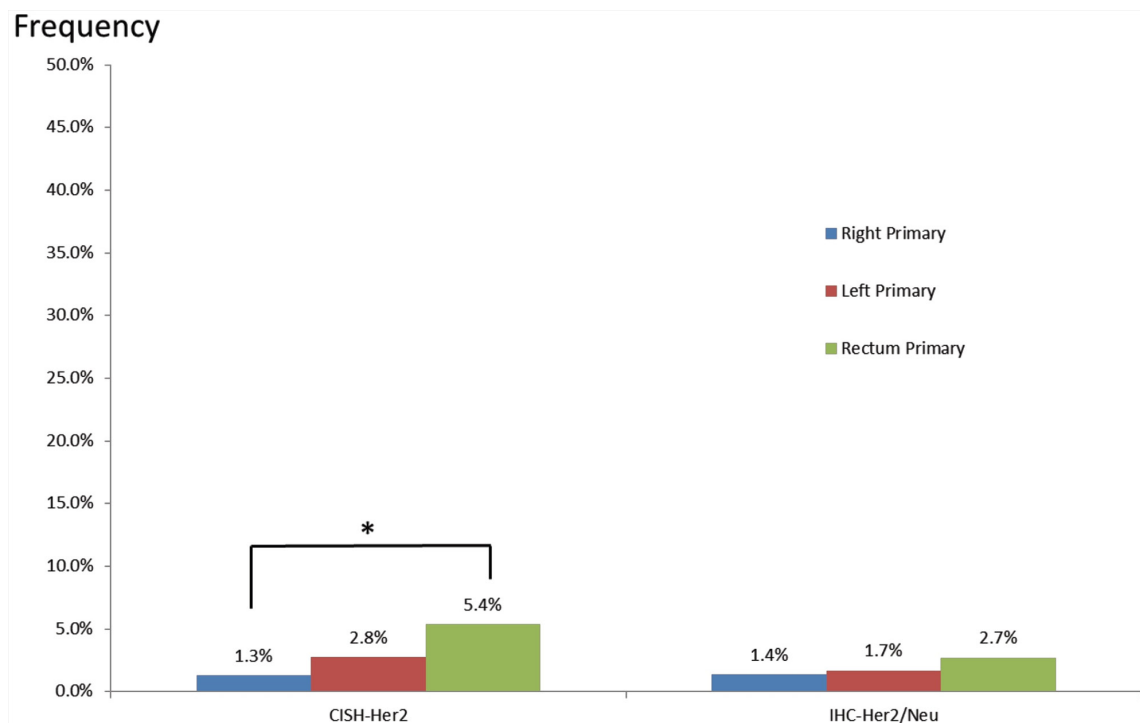

Figure 6: Her2/neu amplification and overexpression in primary tumors of the right colon, left colon, and rectum.

shown to be ineffective in CRC [34], *PIK3CA* mutations have been implicated in EGFR-targeted therapy resistance, as well as increased benefit from aspirin treatment [35-38]. Loss of *PTEN* expression may also confer resistance to EGFR-targeted therapy [39, 40]. The higher rate of activating *PIK3CA* mutations and *PTEN* loss in left- and right-sided colon cancers compared to rectal cancers could contribute to a lower response to anti-EGFR therapies in some colon cancers and supports the use of alternative treatments. Epigenetic modifications that confer sensitivity to EGFR-targeted therapy (e.g., demethylation of the *EREG* promoter) occur more commonly in rectal tumors, but such epigenetic modifications were not assessed in our study [41]. Additionally, the insulin-like growth factor (IGF) pathway has also been implicated in CRC oncogenesis but was not analyzed in our study [42]. In a study of 69 patients with *KRAS* exon 2 mutant CRC, IGF-1 expression was higher in rectal than colon tumors, approaching statistical significance ( $P = 0.06$ ) and suggesting that rectal cancers harbor oncogenic pathways that are different from colon cancers [43]. These are

certainly markers to consider for future confirmatory analyses.

Rectal cancers were shown to have higher expression of *TOPO1* than colon cancers, which could be useful in the direction of irinotecan treatment—first demonstrated in the UK MRC FOCUS trial, but with limited validation from other trials [44]. In the MAVERICC study, which compared first-line treatment using mFOLFOX6/bevacizumab with FOLFIRI/bevacizumab in patients with mCRC, those with left-sided mCRC attained longer median PFS with FOLFIRI/bevacizumab than mFOLFOX6/bevacizumab (13.8 vs. 10.2 months,  $P = 0.040$ ); however, this was not seen in patients with right-sided metastatic colon cancer [45]. Although this difference could be attributed to higher *TOPO1* expression in the rectal tumors that were included in the left-sided cohort, further investigation is needed.

Xenograft model studies [46] and the multicenter phase II HERACLES trial [47] indicate that the Her2/neu pathway is an important therapeutic target in CRCs. Our current study suggests a trend toward higher prevalence of

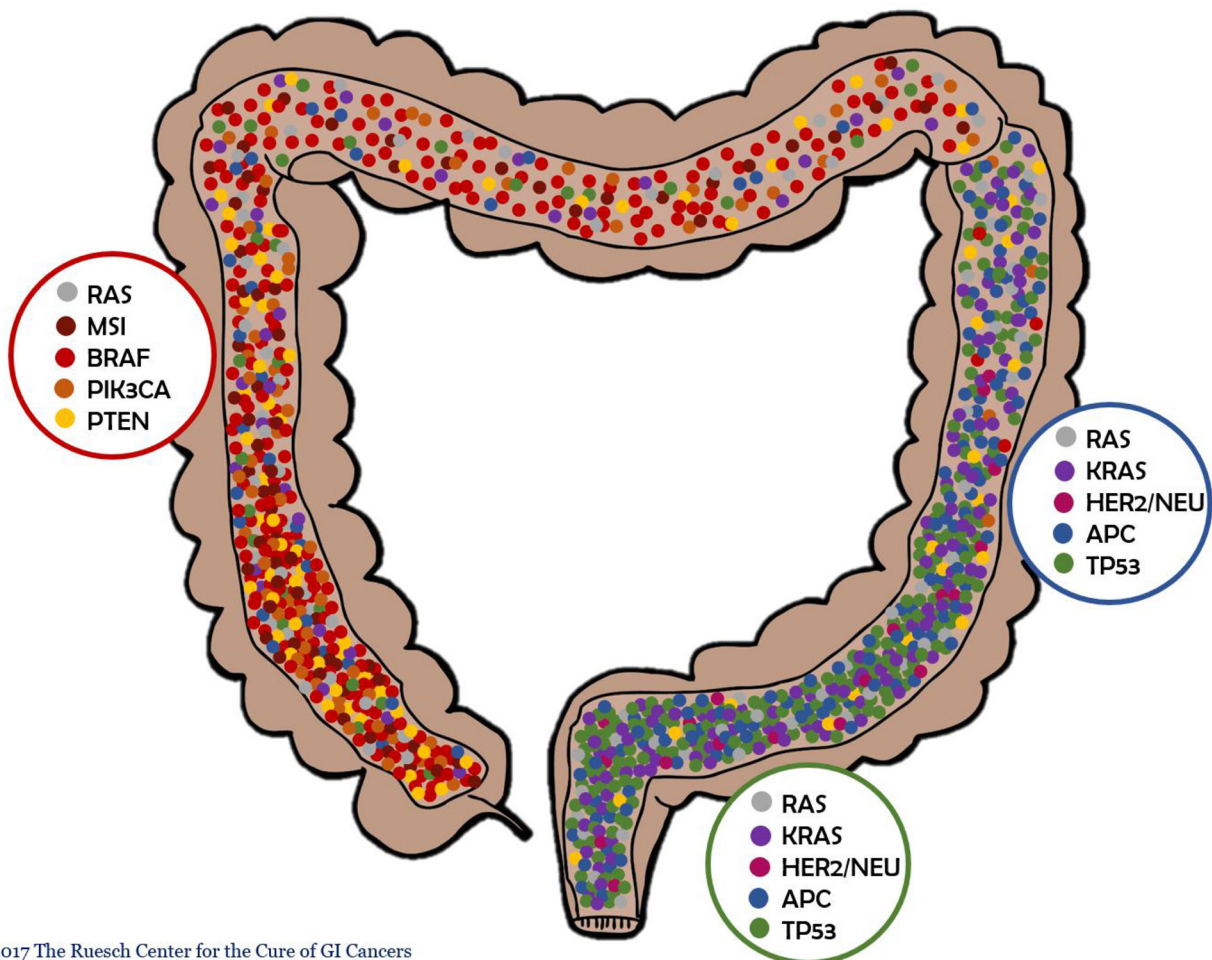

© 2017 The Ruesch Center for the Cure of GI Cancers

**Figure 7: CRCs carry a continuum of molecular alterations from right to left, rather than having a sharp, clear-cut distinction.**



Her2/neu overexpression and amplification in rectal cancers compared to colon cancers, despite the low levels observed overall. The rate of Her2/neu overexpression in rectal cancer has previously been reported to be as high as 26.7% [48]. This finding could be helpful in the selection of patients for future clinical trials of Her2/neu-targeted therapies.

Limitations of our study include lack of DNA methylation evaluation, CMS classification, and the restriction to molecular diagnostic tests widely used in the clinical setting (IHC, ISH, and NGS). In addition, primary or metastatic tumor specimens were categorized according to site of procurement, with no patient identification. Therefore it is possible that the primary cohort may contain samples from primary sites in patients who also had metastatic tumors samples analyzed.

Many tumors were excluded because their primary site was unknown (N = 8,563), significantly limiting the power of this study to detect novel CRC mutations. Metastatic tumors (especially from the colon) were underrepresented relative to primary tumors, and patients with earlier stage colon cancer were also likely underrepresented in this study. This is because the stage at diagnosis was not reported and tumors are most commonly profiled at a later stage. Prior work by El-Deiry and colleagues demonstrated clear molecular differences among different metastatic sites of CRC and primary tumors, including higher Her2/neu expression in lung metastases than primary tumors (4% vs. 1.8%,  $P = 0.028$ ), higher rates of *KRAS* mutations in brain and lung metastases than other sites (65% vs. 59% vs. 47%,  $P = 0.07$  and  $< 0.01$ , respectively), and higher *TOPO1* expression in metastatic tumors than primary tumors (52% vs. 30%) [16]. Rectal tumor specimens also may have received neoadjuvant chemoradiation, potentially altering their IHC profile. In one study of 225 resected rectal cancer specimens, Her2/neu amplification was seen in 45% of untreated tumors but only in 23% of tumors exposed to neoadjuvant chemoradiation ( $P = 0.009$ ) [48]. Finally, our analysis of tumor mutational load is exploratory given the small cohort of tumors assessed (N = 70).

Tumor sidedness has been shown to have a profound influence on clinical outcomes and the current study demonstrates, not only that left- and right-sided colon cancers differ in tumor biology, but also that rectal cancer have a tumor biology that is distinct from colon cancers. Furthermore, it appears that CRCs carry a continuum of molecular alterations from right to left, rather than having a sharp, clear-cut distinction (Figure 7).

In conclusion, our cohorts of colorectal tumors have different rates of MMRd, *BRAF* and *PIK3CA* mutations, tumor mutational burden, and *TOPO1* and Her2/neu expression, providing vital clinical information that has the potential to guide treatment selection for individual patients and change the design of future clinical trials to stratify patients by site of primary tumor.

## MATERIALS AND METHODS

### Data collection

colorectal tumors profiled by a CLIA-certified laboratory (Caris Life Sciences, Phoenix, AZ) between 2009 and 2016 were de-identified and retrospectively analyzed for molecular alterations. Tumor origins were taken from submitted pathology reports and confirmed by board certified pathologists. Tumor samples with origins annotated as “colon, NOS (not otherwise specified)” were excluded from the study; only those tumors originating from specified colon or rectal regions were included. Right-sided tumors were defined as arising from the cecum to the hepatic flexure and left-sided tumors from the splenic flexure to the sigmoid colon. Tumors of the transverse colon were deemed neither right- nor left-sided and were excluded from analysis, as was also the case for the retrospective CALGB/SWOG 80405 analysis [3]. Samples taken from confirmed tumor origins were considered primary tumors while samples taken from organs other than the primary were considered metastases.

### Multiplatform testing

Immunohistochemistry was performed on full formalin-fixed paraffin-embedded (FFPE) sections on glass slides. Slides were stained using an automated system (Benchmark, Ventana Medical Systems, Tucson, AZ; Autostainer, DAKO, Carpinteria, CA) as per the manufacturer’s instructions, and were optimized and validated per CLIA/CAO and ISO requirements. Tumor cells were scored for all proteins of interest with the exception of PD-1, which was scored on tumor infiltrating lymphocytes. Staining was scored for intensity (0 = no staining; 1+ = weak staining; 2+ = moderate staining; 3+ = strong staining) and staining percentage (0-100%). Results were categorized as positive or negative by defined thresholds specific to each marker, based on published clinical literature that associates biomarker status with patient responses to therapeutic agents. A board-certified pathologist evaluated all IHC results independently. Protein IHC details can be found in Supplementary Table 1.

MSI was tested with MIA. MIA included fluorescently labeled primers (Promega, Madison, WI) for co-amplification of seven markers including five mononucleotide repeat markers (BAT-25, BAT26, NR-21, NR24, and MONO-27) and two pentanucleotide repeat markers (Penta C and D). The mononucleotide markers were used for MSI determination while the pentanucleotide markers were used to detect either sample mix-ups or contamination. A tumor sample was considered MMRd if two or more mononucleotide repeats were abnormal. If one mononucleotide repeat was abnormal or repeats were

identical between the tumor and adjacent normal tissue, then the tumor sample was considered MMRp.

CISH was used to detect Her2/neu gene amplification (INFORM HER-2 Dual ISH DNA Probe Cocktail, Ventana, Tucson, AZ). NGS was performed on genomic DNA isolated from FFPE tumor samples using either the MiSeq platform or the NextSeq platform (Illumina, Inc., San Diego, CA), and no matched normal tissue was sequenced. For tumors tested with MiSeq, specific regions of the genome were amplified using the Illumina TruSeq Amplicon Cancer Hotspot panel. For tumors tested with NextSeq, a custom-designed SureSelect XT assay was used to enrich 592 whole-gene targets (Agilent Technologies, Santa Clara, CA). All variants were detected with > 99% confidence based on allele frequency and amplicon coverage with an average sequencing depth of coverage of > 500 and with an analytic sensitivity of 5%. Tumor enrichment was achieved by harvesting targeted tissue by manual microdissection performed on all cases prior to molecular testing. Candidate slides were examined under a microscope and areas containing tumor cells were circled. A laboratory technician harvested targeted tissues for extraction from the marked areas using a dissection microscope. The areas marked and extracted were microscopically reexamined on post-microdissected slides and adequacy of microdissection was verified by a board certified pathologist.

Genetic variants identified were interpreted by board-certified molecular geneticists and categorized as 'pathogenic,' 'presumed pathogenic,' 'variant of unknown significance,' 'presumed benign,' or 'benign,' according to the American College of Medical Genetics and Genomics (ACMG) standards. When assessing mutation frequencies of individual genes, 'pathogenic' and 'presumed pathogenic' were counted as mutations while 'benign' and 'presumed benign' variants and 'variants of unknown significance' were excluded. TML was measured for tumors sequenced using the NextSeq platform (592 genes and 1.4 MB sequenced per tumor) by counting all non-synonymous missense mutations found per tumor that had not been previously described as germline alterations.

### Statistical analysis

Bivariate comparisons of biomarker profiles—protein expression (IHC), gene amplification (CISH), and gene mutations (Sanger, NGS)—between groups were performed using chi-squared tests (IBM SPSS Statistics, Version 23), and significance was defined as  $P < 0.05$ . All reported  $P$ -values were two-sided, and significance was defined as  $P < 0.05$ . A logistic regression model was used for multivariate analysis using gender, age, and primary versus metastatic tumor as covariates, which were entered directly. Only primary tumors were used for the analysis. Metastatic tumors were investigated separately and data are not shown to avoid confusion. Focusing exclusively on primary tumors allows for a more homogenous population of tumors.

### Abbreviations

ACMG, American College of Medical Genetics and Genomics; CI, confidence interval; CIMP, CpG island methylator phenotype; CISH, chromogenic *in situ* hybridization; CMS, consensus molecular subtype; CRC, colorectal cancer; FFPE, formalin-fixed paraffin-embedded; HNPCC; hereditary non-polyposis colorectal cancer; HR, hazard ratio; IGF, insulin-like growth factor; IHC, immunohistochemistry; MB, megabase; mCRC, metastatic colorectal cancer; MIA, microsatellite instability fragment analysis; MMRd, mismatch repair deficient; MMRp, mismatch repair proficient; mOS, median overall survival; MSI, microsatellite instability; NGS, next-generation sequencing; OR, odds ratio; SE, standard error; TCGA, The Cancer Genome Atlas.

### Author contributions

Conception and design: MES, JX, BAW  
Financial support: non-applicable  
Administrative support: JM  
Provision of study materials or patients: MES, BAW, WSE, JJH, PAP, AFS, HJL, JM  
Collection and assembly of data: MES, BAW, JX, ZG  
Data analysis and interpretation: MES, BAW, JX, ZG, HJL  
Manuscript writing: All authors  
Final approval of manuscript: All authors

### ACKNOWLEDGMENTS

We would like to thank Marion Hartley, PhD, Science Writer for Clinical Research at the Ruesch Center for the Cure of Gastrointestinal Cancers, Lombardi Comprehensive Cancer Center, Georgetown University, for her edits and suggestions during the composition of this manuscript.

### CONFLICTS OF INTEREST

Drs. Salem, Weinberg, El-Deiry, Hwang, Philip, Shields, Lenz, and Marshall declare no potential conflicts of interest. Drs. Xiu and Gatalica are employed by Caris Life Sciences.

### FUNDING

No funding support was utilized in this research.

### REFERENCES

1. San Roman AK, Shivdasani RA. Boundaries, junctions and transitions in the gastrointestinal tract. *Exp Cell Res*. 2011; 317: 2711-8. <https://doi.org/10.1016/j.yexcr.2011.07.011>.

2. Guinney J, Dienstmann R, Wang X, de Reynies A, Schlicker A, Sonesson C, Marisa L, Roepman P, Nyamundanda G, Angelino P, Bot BM, Morris JS, Simon IM, et al. The consensus molecular subtypes of colorectal cancer. *Nat Med.* 2015; 21: 1350-6. <https://doi.org/10.1038/nm.3967>.
3. Venook AP, Niedzwiecki D, Innocenti F, Fruth B, Greene C, O'Neil BH, Shaw JE, Atkins JN, Horvath LE, Polite BN, Meyerhardt JA, O'Reilly EM, Goldberg RM, et al. Impact of primary tumor location on overall survival and progression-free survival in patients with metastatic colorectal cancer: analysis of CALGB/SWOG 80405 (Alliance). *J Clin Oncol.* 2016; 34: 3504.
4. Brule SY, Jonker DJ, Karapetis CS, O'Callaghan CJ, Moore MJ, Wong R, Tebbutt NC, Underhill C, Yip D, Zalberg JR, Tu D, Goodwin RA. Location of colon cancer (right-sided versus left-sided) as a prognostic factor and a predictor of benefit from cetuximab in NCIC CO.17. *Eur J Cancer.* 2015; 51: 1405-14. <https://doi.org/10.1016/j.ejca.2015.03.015>.
5. Tejpar S, Stintzing S, Ciardiello F, Tabernero J, Van Cutsem E, Beier F, Esser R, Lenz HJ, Heinemann V. Prognostic and predictive relevance of primary tumor location in patients with RAS wild-type metastatic colorectal cancer: retrospective analyses of the CRYSTAL and FIRE-3 trials. *JAMA Oncol.* 2016. <https://doi.org/10.1001/jamaoncol.2016.3797>.
6. Schrag D, Weng S, Brooks G, Meyerhardt JA, Venook AP. The relationship between primary tumor sidedness and prognosis in colorectal cancer. *J Clin Oncol.* 2016; 2016: 3505.
7. Lee MS, Advani SM, Morris J, Jiang ZQ, Manyam GC, Menter D, Broom BM, Eng C, Overman MJ, Maru DM, Hamilton SR, Kopetz S. Association of primary site and molecular features with progression-free survival and overall survival of metastatic colorectal cancer after anti-epidermal growth factor receptor therapy. *J Clin Oncol.* 2016; 34: 3506.
8. Tamas K, Walenkamp AM, de Vries EG, van Vugt MA, Beets-Tan RG, van Etten B, de Groot DJ, Hospers GA. Rectal and colon cancer: not just a different anatomic site. *Cancer Treat Rev.* 2015; 41: 671-9. <https://doi.org/10.1016/j.ctrv.2015.06.007>.
9. Russo AL, Borger DR, Szymonifka J, Ryan DP, Wo JY, Blaszkowsky LS, Kwak EL, Allen JN, Wadlow RC, Zhu AX, Murphy JE, Faris JE, Dias-Santagata D, et al. Mutational analysis and clinical correlation of metastatic colorectal cancer. *Cancer.* 2014; 120: 1482-90. <https://doi.org/10.1002/cncr.28599>.
10. Van Cutsem E, Kohne CH, Hitre E, Zaluski J, Chang Chien CR, Makhson A, D'Haens G, Pinter T, Lim R, Bodoky G, Roh JK, Folprecht G, Ruff P, et al. Cetuximab and chemotherapy as initial treatment for metastatic colorectal cancer. *N Engl J Med.* 2009; 360: 1408-17. <https://doi.org/10.1056/NEJMoa0805019>.
11. Douillard JY, Siena S, Cassidy J, Tabernero J, Burkes R, Barugel M, Humblet Y, Bodoky G, Cunningham D, Jassam J, Rivera F, Kocakova I, Ruff P, et al. Final results from PRIME: randomized phase III study of panitumumab with FOLFOX4 for first-line treatment of metastatic colorectal cancer. *Ann Oncol.* 2014; 25: 1346-55. <https://doi.org/10.1093/annonc/mdu141>.
12. Yamauchi M, Morikawa T, Kuchiba A, Imamura Y, Qian ZR, Nishihara R, Liao X, Waldron L, Hoshida Y, Huttenhower C, Chan AT, Giovannucci E, Fuchs C, et al. Assessment of colorectal cancer molecular features along bowel subsites challenges the conception of distinct dichotomy of proximal versus distal colorectum. *Gut.* 2012; 61: 847-54. <https://doi.org/10.1136/gutjnl-2011-300865>.
13. Le DT, Uram JN, Wang H, Bartlett BR, Kemberling H, Eyring AD, Skora AD, Luber BS, Azad NS, Laheru D, Biedrzycki B, Donehower RC, Zaheer A, et al. PD-1 blockade in tumors with mismatch-repair deficiency. *N Engl J Med.* 2015; 372: 2509-20. <https://doi.org/10.1056/NEJMoa1500596>.
14. The Cancer Genome Atlas Network. Comprehensive molecular characterization of human colon and rectal cancer. *Nature.* 2012; 487: 330-7. <https://doi.org/10.1038/nature11252>.
15. Dunne PD, McArt DG, Bradley CA, O'Reilly PG, Barrett HL, Cummins R, O'Grady T, Arthur K, Loughrey MB, Allen WL, McDade SS, Waugh DJ, Hamilton PW, et al. Challenging the cancer molecular stratification dogma: intratumoral heterogeneity undermines consensus molecular subtypes and potential diagnostic value in colorectal cancer. *Clin Cancer Res.* 2016; 22: 4095-104. <https://doi.org/10.1158/1078-0432.CCR-16-0032>.
16. El-Deiry WS, Vijayvergia N, Xiu J, Scicchitano A, Lim B, Yee NS, Harvey HA, Gatalica Z, Reddy S. Molecular profiling of 6,892 colorectal cancer samples suggests different possible treatment options specific to metastatic sites. *Cancer Biol Ther.* 2015; 16: 1726-37. <https://doi.org/10.1080/15384047.2015.1113356>.
17. Hendifar A, Yang D, Lenz F, Lurje G, Pohl A, Lenz C, Ning Y, Zhang W, Lenz HJ. Gender disparities in metastatic colorectal cancer survival. *Clin Cancer Res.* 2009; 15: 6391-7. <https://doi.org/10.1158/1078-0432.CCR-09-0877>.
18. Meguid RA, Slidell MB, Wolfgang CL, Chang DC, Ahuja N. Is there a difference in survival between right- versus left-sided colon cancers? *Ann Surg Oncol.* 2008; 15: 2388-94. <https://doi.org/10.1245/s10434-008-0015-y>.
19. Caiazza F, Ryan EJ, Doherty G, Winter DC, Sheahan K. Estrogen receptors and their implications in colorectal carcinogenesis. *Front Oncol.* 2015; 5: 19. <https://doi.org/10.3389/fonc.2015.00019>.
20. Jassam N, Bell SM, Speirs V, Quirke P. Loss of expression of oestrogen receptor beta in colon cancer and its association with Dukes' staging. *Oncol Rep.* 2005; 14: 17-21.
21. Slattery ML, Potter JD, Curtin K, Edwards S, Ma KN, Anderson K, Schaffer D, Samowitz WS. Estrogens reduce and withdrawal of estrogens increase risk of microsatellite

- instability-positive colon cancer. *Cancer Res.* 2001; 61: 126-30.
22. Gatalica Z, Vranic S, Xiu J, Swensen J, Reddy S. High microsatellite instability (MSI-H) colorectal carcinoma: a brief review of predictive biomarkers in the era of personalized medicine. *Fam Cancer.* 2016; 15: 405-12. <https://doi.org/10.1007/s10689-016-9884-6>.
  23. Ribic CM, Sargent DJ, Moore MJ, Thibodeau SN, French AJ, Goldberg RM, Hamilton SR, Laurent-Puig P, Gryfe R, Shepherd LE, Tu D, Redston M, Gallinger S. Tumor microsatellite-instability status as a predictor of benefit from fluorouracil-based adjuvant chemotherapy for colon cancer. *N Engl J Med.* 2003; 349: 247-57. <https://doi.org/10.1056/NEJMoa022289>.
  24. Stadler ZK, Battaglin F, Middha S, Hechtman JF, Tran C, Cercek A, Yaeger R, Segal NH, Varghese AM, Reidy-Lagunes DL, Kemeny NE, Salo-Mullen EE, Ashraf A, et al. Reliable detection of mismatch repair deficiency in colorectal cancers using mutational load in next-generation sequencing panels. *J Clin Oncol.* 2016; 34: 2141-7. <https://doi.org/10.1200/JCO.2015.65.1067>.
  25. Karran P. Mechanisms of tolerance to DNA damaging therapeutic drugs. *Carcinogenesis.* 2001; 22: 1931-7.
  26. Colli LM, Machiela MJ, Myers TA, Jessop L, Yu K, Chanock SJ. Burden of nonsynonymous mutations among TCGA cancers and candidate immune checkpoint inhibitor responses. *Cancer Res.* 2016; 76: 3767-72. <https://doi.org/10.1158/0008-5472.CAN-16-0170>.
  27. Giannakis M, Mu XJ, Shukla SA, Qian ZR, Cohen O, Nishihara R, Bahl S, Cao Y, Amin-Mansour A, Yamauchi M, Sukawa Y, Stewart C, Rosenberg M, et al. Genomic correlates of immune-cell infiltrates in colorectal carcinoma. *Cell Rep.* 2016; 17: 1206. <https://doi.org/10.1016/j.celrep.2016.10.009>.
  28. Tie J, Gibbs P, Lipton L, Christie M, Jorissen RN, Burgess AW, Croxford M, Jones I, Langland R, Kosmider S, McKay D, Bollag G, Nolop K, et al. Optimizing targeted therapeutic development: analysis of a colorectal cancer patient population with the BRAF(V600E) mutation. *Int J Cancer.* 2011; 128: 2075-84. <https://doi.org/10.1002/ijc.25555>.
  29. Davies H, Bignell GR, Cox C, Stephens P, Edkins S, Clegg S, Teague J, Woffendin H, Garnett MJ, Bottomley W, Davis N, Dicks E, Ewing R, et al. Mutations of the BRAF gene in human cancer. *Nature.* 2002; 417: 949-54. <https://doi.org/10.1038/nature00766>.
  30. Weisenberger DJ, Siegmund KD, Campan M, Young J, Long TI, Faasse MA, Kang GH, Widschwendter M, Weener D, Buchanan D, Koh H, Simms L, Barker M, et al. CpG island methylator phenotype underlies sporadic microsatellite instability and is tightly associated with BRAF mutation in colorectal cancer. *Nat Genet.* 2006; 38: 787-93. <https://doi.org/10.1038/ng1834>.
  31. Corcoran RB, Atreya CE, Falchook GS, Kwak EL, Ryan DP, Bendell JC, Hamid O, Messersmith WA, Daud A, Kurzrock R, Pierobon M, Sun P, Cunningham E, et al. Combined BRAF and MEK inhibition with dabrafenib and trametinib in BRAF V600-mutant colorectal cancer. *J Clin Oncol.* 2015; 33: 4023-31. <https://doi.org/10.1200/JCO.2015.63.2471>.
  32. Loupakis F, Yang D, Yau L, Feng S, Cremolini C, Zhang W, Maus MK, Antoniotti C, Langer C, Scherer SJ, Muller T, Hurwitz HI, Saltz L, et al. Primary tumor location as a prognostic factor in metastatic colorectal cancer. *J Natl Cancer Inst.* 2015; 107. <https://doi.org/10.1093/jnci/dju427>.
  33. Boeckx N, Toler A, Op de Beeck K, Kafatos G, Deschoolmeester V, Rolfo CD, Lowe K, Van Camp G, Demonty G, Peeters M. Primary tumor sidedness impacts on prognosis and treatment outcome: results from three randomized studies of panitumumab plus chemotherapy versus chemotherapy or chemotherapy plus bevacizumab in 1st and 2nd line RAS/BRAF WT mCRC. *Ann Oncol.* 2016; 27: vi26-vi7.
  34. Janku F, Wheler JJ, Naing A, Stepanek VM, Falchook GS, Fu S, Garrido-Laguna I, Tsimberidou AM, Pihapaul SA, Moulder SL, Lee JJ, Luthra R, Hong DS, et al. PIK3CA mutations in advanced cancers: characteristics and outcomes. *Oncotarget.* 2012; 3: 1566-75. <https://doi.org/10.18632/oncotarget.716>.
  35. De Roock W, Claes B, Bernasconi D, De Schutter J, Biesmans B, Fountzilias G, Kalogeras KT, Kotoula V, Papamichael D, Laurent-Puig P, Penault-Llorca F, Rougier P, Vincenzi B, et al. Effects of KRAS, BRAF, NRAS, and PIK3CA mutations on the efficacy of cetuximab plus chemotherapy in chemotherapy-refractory metastatic colorectal cancer: a retrospective consortium analysis. *Lancet Oncol.* 2010; 11: 753-62. [https://doi.org/10.1016/S1470-2045\(10\)70130-3](https://doi.org/10.1016/S1470-2045(10)70130-3).
  36. Liao X, Lochhead P, Nishihara R, Morikawa T, Kuchiba A, Yamauchi M, Imamura Y, Qian ZR, Baba Y, Shima K, Sun R, Noshok K, Meyerhardt JA, et al. Aspirin use, tumor PIK3CA mutation, and colorectal-cancer survival. *N Engl J Med.* 2012; 367: 1596-606. <https://doi.org/10.1056/NEJMoa1207756>.
  37. Domingo E, Church DN, Sieber O, Ramamoorthy R, Yanagisawa Y, Johnstone E, Davidson B, Kerr DJ, Tomlinson IP, Midgley R. Evaluation of PIK3CA mutation as a predictor of benefit from nonsteroidal anti-inflammatory drug therapy in colorectal cancer. *J Clin Oncol.* 2013; 31: 4297-305. <https://doi.org/10.1200/JCO.2013.50.0322>.
  38. Jhawer M, Goel S, Wilson AJ, Montagna C, Ling YH, Byun DS, Nasser S, Arango D, Shin J, Klampfer L, Augenlicht LH, Perez-Soler R, Mariadason JM. PIK3CA mutation/PTEN expression status predicts response of colon cancer cells to the epidermal growth factor receptor inhibitor cetuximab. *Cancer Res.* 2008; 68: 1953-61. <https://doi.org/10.1158/0008-5472.CAN-07-5659>.
  39. Mao C, Liao RY, Chen Q. Loss of PTEN expression predicts resistance to EGFR-targeted monoclonal antibodies in patients with metastatic colorectal cancer. *Br J Cancer.* 2010; 102: 940. <https://doi.org/10.1038/sj.bjc.6605575>.

40. Wang ZH, Gao QY, Fang JY. Loss of PTEN expression as a predictor of resistance to anti-EGFR monoclonal therapy in metastatic colorectal cancer: evidence from retrospective studies. *Cancer Chemother Pharmacol.* 2012; 69: 1647-55. <https://doi.org/10.1007/s00280-012-1886-y>.
41. Qu X, Sandmann T, Frierson H Jr, Fu L, Fuentes E, Walter K, Okrah K, Rumpel C, Moskaluk C, Lu S, Wang Y, Bourgon R, Penuel E, et al. Integrated genomic analysis of colorectal cancer progression reveals activation of EGFR through demethylation of the EREG promoter. *Oncogene.* 2016. <https://doi.org/10.1038/onc.2016.170>.
42. Wolpin BM, Meyerhardt JA, Chan AT, Ng K, Chan JA, Wu K, Pollak MN, Giovannucci EL, Fuchs CS. Insulin, the insulin-like growth factor axis, and mortality in patients with nonmetastatic colorectal cancer. *J Clin Oncol.* 2009; 27: 176-85. <https://doi.org/10.1200/JCO.2008.17.9945>.
43. Scialfani F, Kim TY, Cunningham D, Kim TW, Tabernero J, Schmoll HJ, Roh JK, Kim SY, Park YS, Guren TK, Hawkes E, Clarke SJ, Ferry D, et al. Dolutuzumab in chemorefractory KRAS exon 2 mutant colorectal cancer: results from a randomised phase II/III trial. *Int J Cancer.* 2016. <https://doi.org/10.1002/ijc.30453>.
44. Braun MS, Richman SD, Quirke P, Daly C, Adlard JW, Elliott F, Barrett JH, Selby P, Meade AM, Stephens RJ, Parmar MK, Seymour MT. Predictive biomarkers of chemotherapy efficacy in colorectal cancer: results from the UK MRC FOCUS trial. *J Clin Oncol.* 2008; 26: 2690-8. <https://doi.org/10.1200/JCO.2007.15.5580>.
45. Lenz HJ, Lee FC, Yau L, Koh HA, Knost JA, Mitchell EP, Bosanac I, Mancao C, Parikh A. MAVERICC, a phase 2 study of mFOLFOX6-bevacizumab (BV) vs FOLFIRI-BV with biomarker stratification as first-line (1L) chemotherapy (CT) in patients (pts) with metastatic colorectal cancer (mCRC). *J Clin Oncol.* 2016; 34: 3515.
46. Bertotti A, Migliardi G, Galimi F, Sassi F, Torti D, Isella C, Cora D, Di Nicolantonio F, Buscarino M, Petti C, Ribero D, Russolillo N, Muratore A, et al. A molecularly annotated platform of patient-derived xenografts (“xenopatient”) identifies HER2 as an effective therapeutic target in cetuximab-resistant colorectal cancer. *Cancer Discov.* 2011; 1: 508-23. <https://doi.org/10.1158/2159-8290.CD-11-0109>.
47. Sartore-Bianchi A, Trusolino L, Martino C, Bencardino K, Lonardi S, Bergamo F, Zagonel V, Leone F, Depetris I, Martinelli E, Troiani T, Ciardiello F, Racca P, et al. Dual-targeted therapy with trastuzumab and lapatinib in treatment-refractory, KRAS codon 12/13 wild-type, HER2-positive metastatic colorectal cancer (HERACLES): a proof-of-concept, multicentre, open-label, phase 2 trial. *Lancet Oncol.* 2016; 17: 738-46. [https://doi.org/10.1016/S1470-2045\(16\)00150-9](https://doi.org/10.1016/S1470-2045(16)00150-9).
48. Conradi LC, Styczen H, Sprenger T, Wolff HA, Rodel C, Nietert M, Homayounfar K, Gaedcke J, Kitz J, Talaulicar R, Becker H, Ghadimi M, Middel P, et al. Frequency of HER-2 positivity in rectal cancer and prognosis. *Am J Surg Pathol.* 2013; 37: 522-31. <https://doi.org/10.1097/PAS.0b013e318272ff4d>.
