# Supplementary material for: Comparative molecular analyses of left-sided colon, right-sided colon, and rectal cancers
Source: PubMed Central journal article supplement (PMC5689690; doi:10.18632/oncotarget.21169), 2017-09-21
Supplement: oncotarget-08-86356-s001.pdf [file oncotarget-08-86356-s001.pdf]

## Comparative molecular analyses of left-sided colon, right-sided colon, and rectal cancers

### SUPPLEMENTARY MATERIALS

Supplementary Table 1: Protein immunohistochemistry details

| Immunohistochemistry Biomarker | Antibody    | Manufacturer     | Location        |
|--------------------------------|-------------|------------------|-----------------|
| cMET                           | SP44        | Ventana          | Tucson, AZ      |
| EGFR                           | 31G7        | Zymed/Invitrogen | Frederick, MD   |
| ERCC1                          | 8F1         | ABCAM            | Cambridge, MA   |
| Her2                           | 4B5         | Ventana          | Tucson, AZ      |
| MGMT                           | MT23.2      | Invitrogen       | Frederick, MD   |
| PD-1                           | NAT105      | Ventana          | Tucson, AZ      |
| PD-L1                          | SP142       | Spring Bio       | Pleasanton, CA  |
| PGP                            | C494        | Invitrogen       | Frederick, MD   |
| PTEN                           | 6H2.1       | Dako             | Carpinteria, CA |
| RRM1                           | polyclonal  | Proteintech      | Rosemont, IL    |
| TLE3                           | POLY        | Lifespan         | Seattle, WA     |
| TOP2A                          | 3F6         | Leica            | UK              |
| TOPO1                          | 1D6         | Leica            | UK              |
| TS                             | TS106/4H4B1 | Invitrogen       | Frederick, MD   |
| TUBB3                          | (POLY)      | Covance          | Princeton, NJ   |
